# Supplementary material
Source: bioRxiv or medRxiv preprint supplement (https://www.biorxiv.org/highwire/filestream/51401/field_highwire_adjunct_files/0/170993-1.pdf)

**Table S1. Responses by Carnegie classification.** Means of the Likert-scale responses for respondents whose home institution is classified as Associate’s (Assc), Baccalaureate (BS), Master’s (MS), or Doctoral (PhD). Two-sided *P* values from a Kolmogorov-Smirnov test of the Likert-scale responses for each pairwise test are shown. The pairs are indicated by the heading of the column; e.g., *P*\_Assc\_BS is the *P* value for the Associate’s (Assc)/Baccalaureate (BS) pair. Significant differences are in bold.

| Survey Skill | Assc  | BS    | MS    | PhD   | <i>P</i> _Assc_BS | <i>P</i> _Assc_MS | <i>P</i> _Assc_PhD | <i>P</i> _BS_MS | <i>P</i> _BS_PhD | <i>P</i> _MS_PhD |
|--------------|-------|-------|-------|-------|-------------------|-------------------|--------------------|-----------------|------------------|------------------|
| S1           | 3.937 | 4.071 | 4.144 | 4.285 | 0.7634            | 0.2062            | <b>0.0215</b>      | 0.9847          | <b>0.0227</b>    | 0.1252           |
| S2           | 3.127 | 3.24  | 3.459 | 3.618 | 0.9725            | 0.0739            | <b>0.0002</b>      | 0.1919          | <b>0.0006</b>    | 0.3329           |
| S3           | 3.66  | 4.004 | 4.073 | 4.118 | 0.2647            | <b>0.0237</b>     | <b>0.0006</b>      | 0.8908          | 0.2082           | 0.9984           |
| S4           | 3.937 | 4.348 | 4.365 | 4.222 | <b>0.0059</b>     | <b>0.0104</b>     | 0.0692             | 0.9999          | 0.8539           | 0.6417           |
| S5           | 3.787 | 4.207 | 4.219 | 4.1   | <b>0.0193</b>     | <b>0.0090</b>     | 0.0588             | 1.0000          | 0.9919           | 0.9335           |
| S6           | 3.284 | 3.402 | 3.455 | 3.415 | 0.9240            | 0.7256            | 0.9893             | 0.8989          | 0.7463           | 0.9971           |
| S7           | 3.115 | 3.381 | 3.398 | 3.283 | 0.1260            | 0.1725            | 0.4016             | 0.9490          | 0.4904           | 0.9816           |
| S8           | 3.461 | 3.716 | 3.778 | 3.609 | 0.3526            | 0.1760            | 0.8843             | 0.1671          | 0.3987           | 0.7214           |
| S9           | 3.344 | 3.611 | 3.606 | 3.439 | 0.0881            | 0.3552            | 0.9302             | 1.0000          | 0.0686           | 0.3931           |
| S10          | 3.117 | 3.145 | 3.19  | 3.116 | 0.6546            | 0.7620            | 1.0000             | 1.0000          | 0.3707           | 0.5031           |
| S11          | 3     | 3.148 | 3.271 | 3.248 | 0.3277            | 0.1056            | 0.3168             | 0.9654          | 0.4765           | 0.9938           |
| S12          | 2.881 | 3.095 | 3.235 | 3.189 | <b>0.0105</b>     | <b>0.0441</b>     | <b>0.0493</b>      | 0.3499          | 0.6142           | 0.9997           |
| S13          | 2.267 | 2.793 | 2.794 | 3.18  | <b>0.0001</b>     | <b>0.0004</b>     | <b>1.2926E-10</b>  | 1.0000          | <b>0.0008</b>    | <b>0.0134</b>    |
| S14          | 2.926 | 3.183 | 3.37  | 3.401 | <b>0.0285</b>     | <b>0.0064</b>     | <b>0.0050</b>      | 0.3410          | <b>0.0234</b>    | 0.9969           |
| S15          | 2.856 | 3.099 | 3.206 | 3.44  | 0.1024            | 0.0669            | <b>1.8909E-05</b>  | 0.9425          | <b>0.0171</b>    | 0.2261           |

**Fig. S1. Geographic distribution of respondents.** The location (city/state) of each response to the survey was obtained using e-mail and/or IP addresses. The distribution of responses for the contiguous US is shown. A small circle represents a response at a particular location ( $n = 1,081$ ); a darker circle represents multiple responses (the darker the circle, the more responses). Note that the legend applies to the states themselves—e.g., there were more than seventy-six responses from California—and that there are no states with no responses. Responses (not shown) were also received from Alaska, Hawaii, Argentina, Australia, Canada, Denmark, France, Italy, Korea, New Zealand, Norway, Puerto Rico, the Republic of Poland, Switzerland, and the United Kingdom.

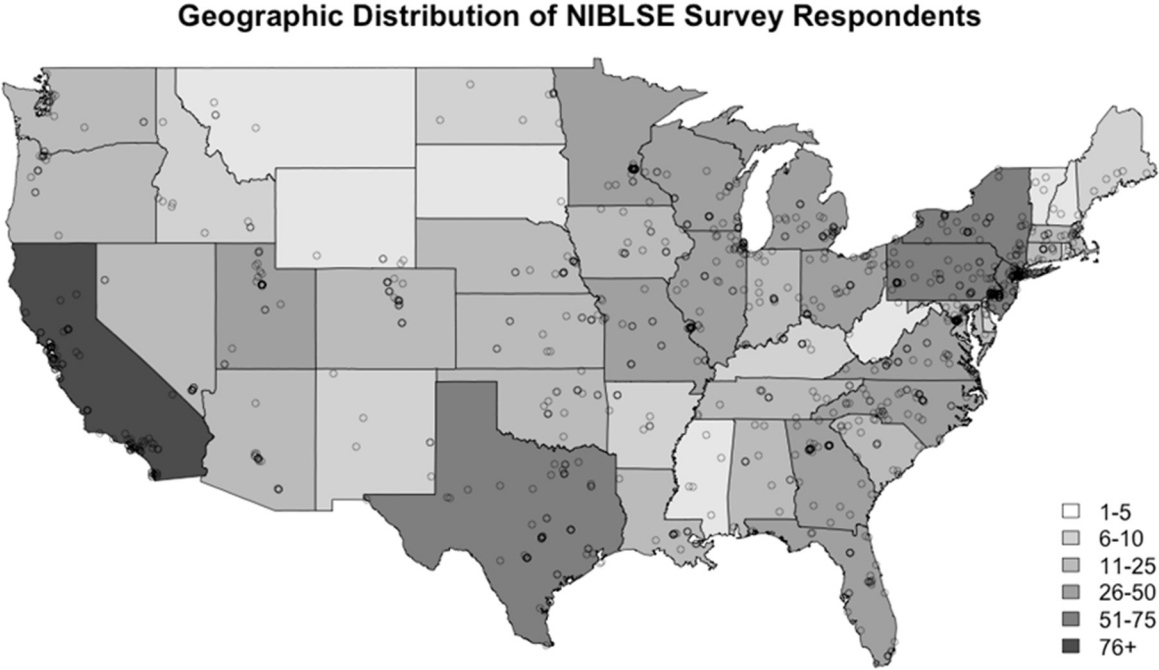

**Fig. S2. Histogram of number of skills covered per syllabus.** The number of syllabi that addressed the specified number of bioinformatics skills (S1 to S15). For example, ten syllabi addressed only one of the fifteen skills. On average, a syllabus covered 5.5 skills (with a median of 6 skills addressed). Although all skills were covered in aggregate across the submitted syllabi, no syllabus covered more than thirteen out of the fifteen skills.

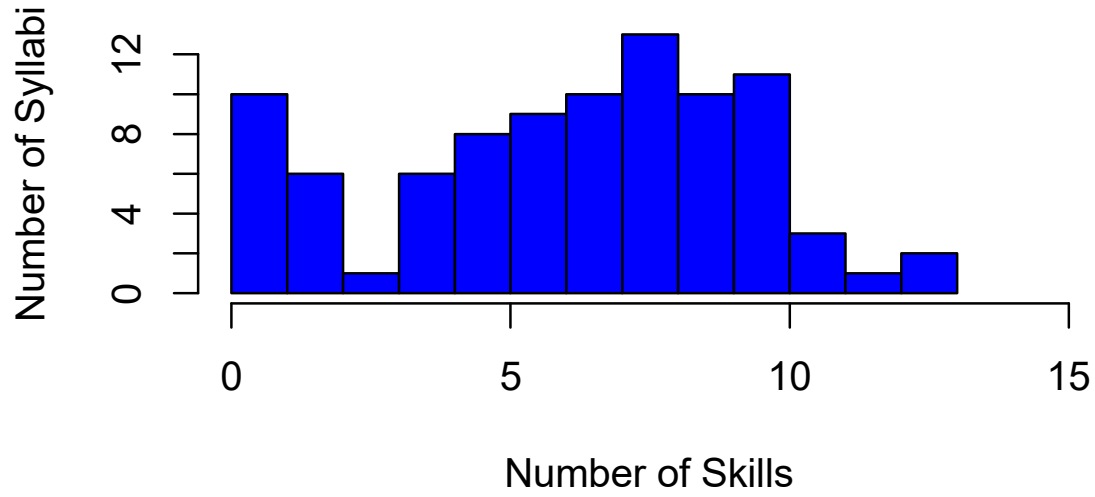

Supplement: Supplementary file [file 170993-1.pdf]
